# Supplementary material
Source: PubMed Central journal article supplement (PMC8312478)
Supplement: NIHMS1720742-supplement-King_NatNeuro_SupMaterial_2019.pdf [file NIHMS1720742-supplement-King_NatNeuro_SupMaterial_2019.pdf]

In the format provided by the authors and unedited.

# Functional boundaries in the human cerebellum revealed by a multi-domain task battery

Maedbh King<sup>1,2</sup>, Carlos R. Hernandez-Castillo<sup>2</sup>, Russell A. Poldrack<sup>3</sup>, Richard B. Ivry<sup>1</sup> and Jörn Diedrichsen <sup>2,4,5\*</sup>

---

<sup>1</sup>Department of Psychology, University of California, CA, Berkeley, USA. <sup>2</sup>Brain and Mind Institute, Western University, Ontario, London, Canada.

<sup>3</sup>Department of Psychology, Stanford University, CA, Stanford, USA. <sup>4</sup>Department of Statistical and Actuarial Sciences, Western University, London, Ontario, Canada. <sup>5</sup>Department of Computer Science, Western University, London, Ontario, Canada. \*e-mail: [jdiedric@uwo.ca](mailto:jdiedric@uwo.ca)

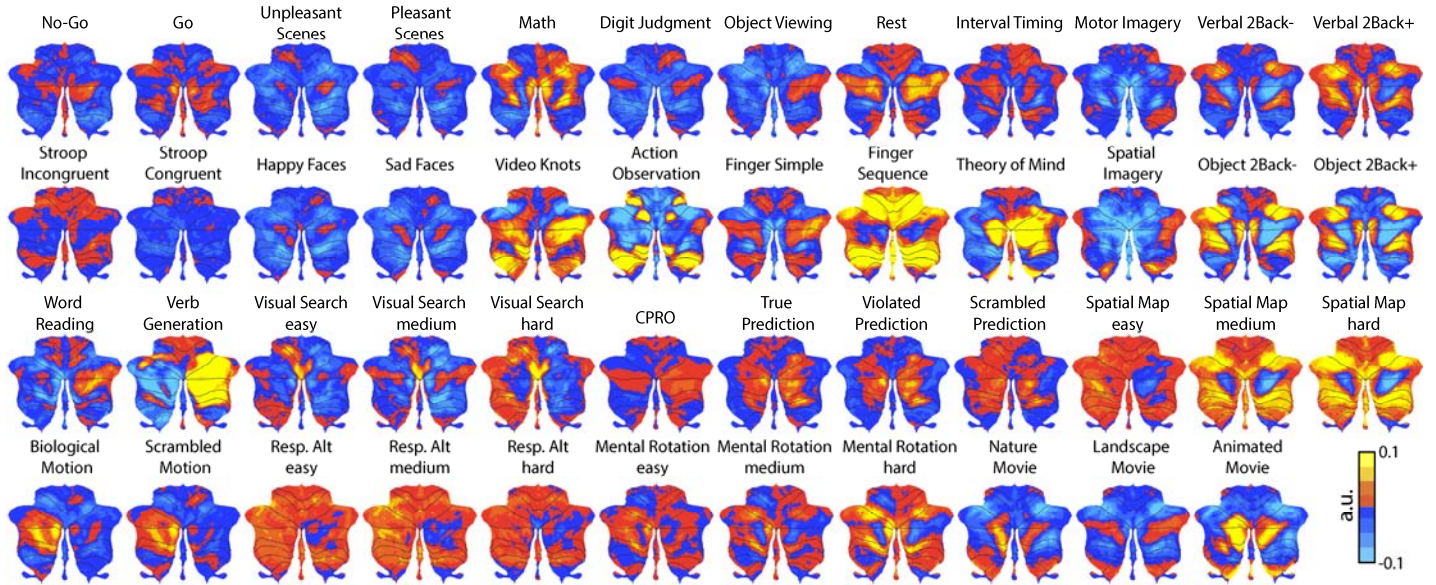

Supplementary Figure 1

***Unthresholded, group-averaged activation maps for the 47 unique task conditions displayed on a surface-based representation of the cerebellar cortex<sup>14</sup>.***

*All activations are calculated relative to the mean activation across all conditions. Red-to-yellow colors indicate increases in activation and blue colors indicate decreases in activation. Activity is normalized by the root-mean-square-error of the time-series fit for each voxel.*

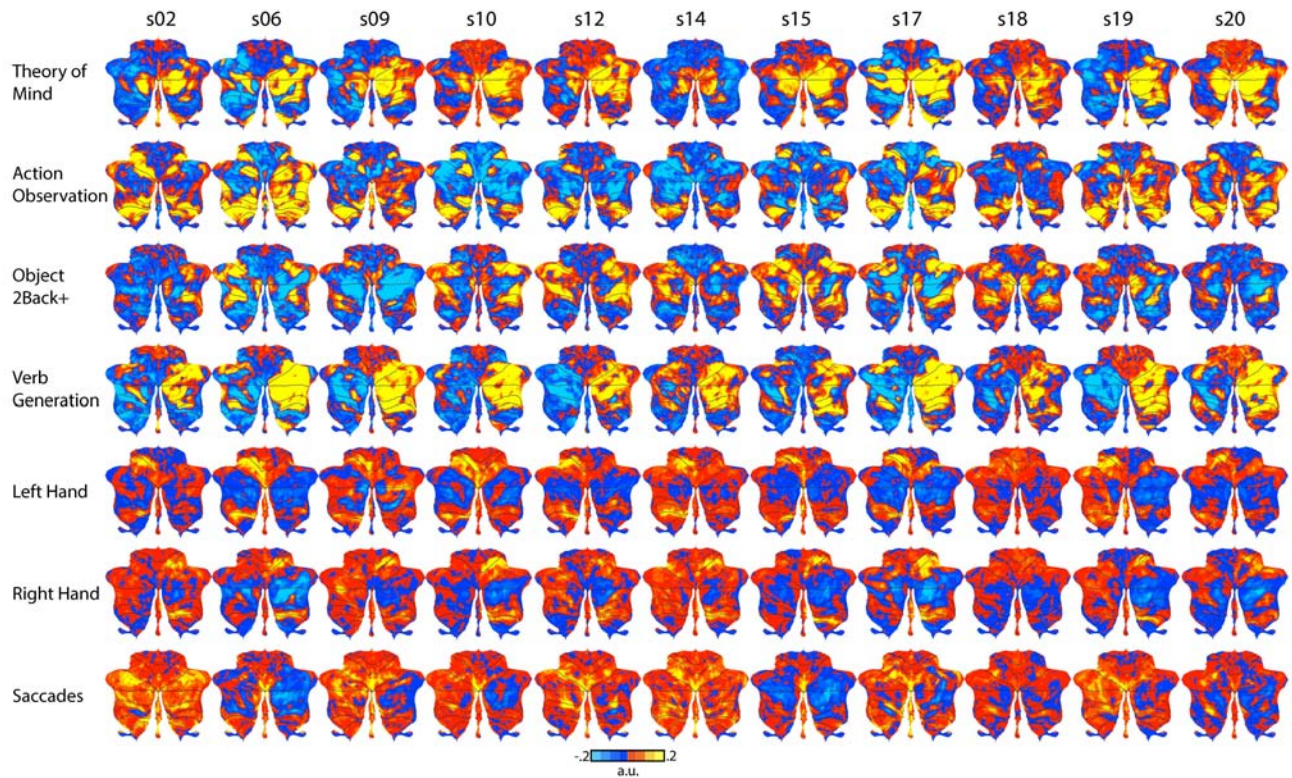

**Supplementary Figure 2**

***Unthresholded, individual activation maps for 4 representative tasks and motor feature maps for 11 representative participants.***

*All activations are calculated relative to the mean activation across all conditions. Red-to-yellow colors indicate increases in activation and blue colors indicate decreases in activation. Activity is normalized by the root-mean-square-error of the time-series fit for each voxel.*

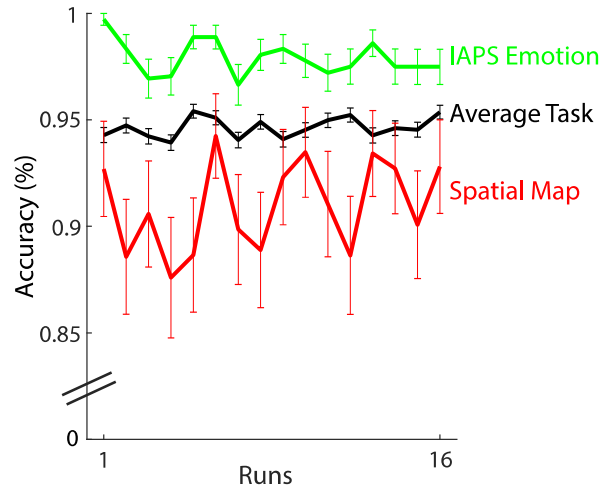

### Supplementary Figure 3

#### **Stability of task performance.**

Percent accuracy, averaged across two scanning sessions, each composed of eight runs. Average across all tasks is shown in black. Poorest performance was on the spatial map task (red line) and best performance was on the IAPS emotion task (green line). Error bars indicate between-subject ( $N=24$ ) standard error.

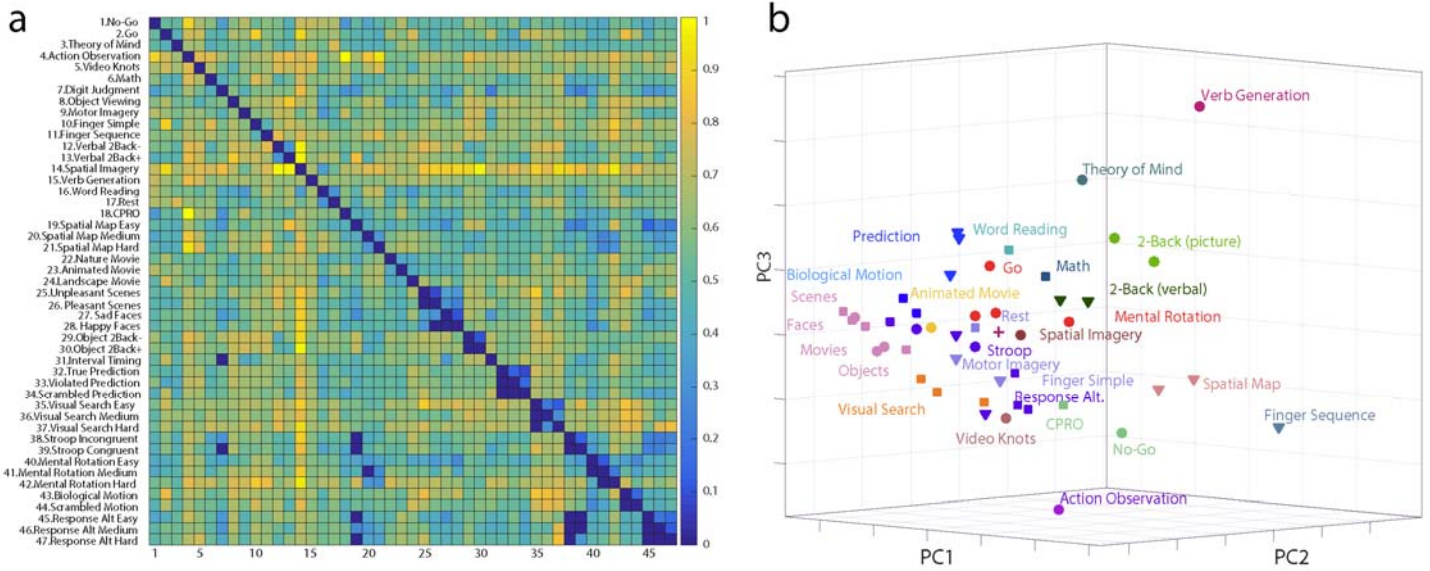

**Supplementary Figure 4**

**Representational task space for 47 unique task conditions.**

**(a)** Group-averaged representational dissimilarity matrix (RDM) data for the unique 47 task conditions. Shared tasks are averaged across the four scanning sessions. Dark blue represents low dissimilarity between pairwise task-evoked activity patterns while high distances (bright yellow) represent high dissimilarity between pairwise task-evoked activity patterns. Thresholded values are shown below the diagonal (dark blue cells indicating pairwise comparisons between task conditions were not significant ( $p < .001$ , e.g., pleasant and unpleasant scenes). **(b)** A multi-dimensional scaling plot (MDS, using first three PCs for display purposes), showing the relative similarity of the task-evoked activity patterns after correction for activity related to basic motor output. Hierarchical clustering was applied to the tasks, with colors in both the RDM and MDS indicating cluster membership.

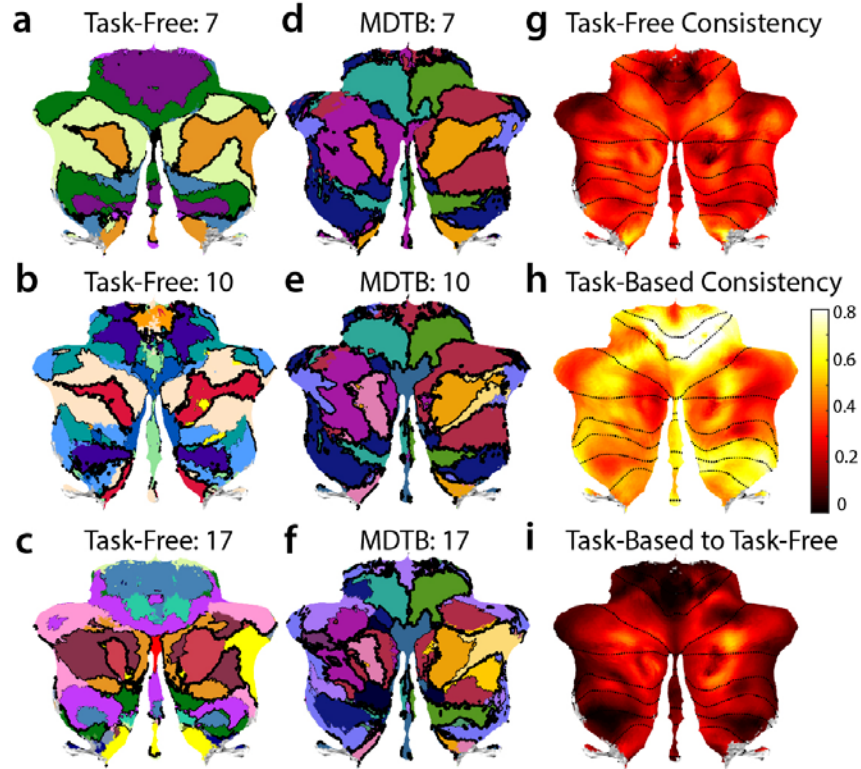

**Supplementary Figure 5**

*Comparison of task-based and task-free parcellations.*

7, 10, and 17 region parcellations derived from task-free HCP (**a-c**) and MDTB (**d-f**) data. (**g**) Average Rand coefficient between task-free parcellations, computed locally (1cm sphere) around each cerebellar voxel. (**h**) Average Rand coefficient between MDTB parcellations. (**i**) Average difference of Rand coefficients for the MDTB and task-free parcellations.

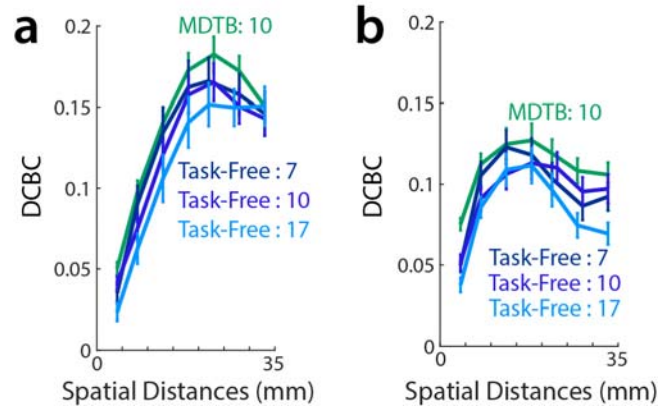

### Supplementary Figure 6

**Cross-validated evaluation of MDTB parcellation on a subset of 7 tasks, selected to be most dissimilar to task conditions included in the data set.**

For comparison purposes, task-free parcellations are evaluated on the same tasks. **(a)** MDTB parcellation trained on Set A and evaluated on 7 tasks from Set B (Mental Rotation Easy, Mental Rotation Medium, Mental Rotation Hard, Spatial Map Medium, Spatial Map Hard, Animated Movie, and Nature Movie). **(b)** MDTB parcellation trained on Set B and evaluated on 7 tasks from Set A (Sad Faces, Interval Timing, Go, Theory of Mind, Word Reading, Motor Imagery, Math). Error-bars indicate between-subject standard error ( $N=24$ ).

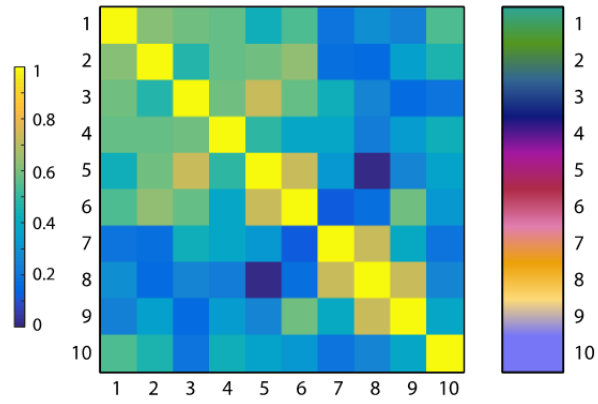

### Supplementary Figure 7

***Pearson correlation between the task-profiles of the 10 regions of the MDTB parcellation.***

*The values in the correlation matrix are scaled between 0 (blue) and 1 (yellow). The bar on the right denotes the colors of each of the 10 regions (see Fig 5).*



| Task Name                          | Task Description                                                                                                                                                                                                               | Dataset | Conditions                           | Hand Assignment |
|------------------------------------|--------------------------------------------------------------------------------------------------------------------------------------------------------------------------------------------------------------------------------|---------|--------------------------------------|-----------------|
| Object Viewing                     | Passive viewing, pictures of objects and a checkerboard pattern.                                                                                                                                                               | A       |                                      | None            |
| Motor Imagery <sup>a</sup>         | Imagine playing a game of tennis.                                                                                                                                                                                              | A       |                                      | None            |
| Stroop <sup>a</sup>                | 3AFC, indicating color of stimulus word (3 colors), comparing conditions in which color-word mapping is congruent or incongruent (Stroop task).                                                                                | A       | Congruent<br>Incongruent             | Both            |
| Verbal Working Memory <sup>a</sup> | 2AFC, indicating if current stimulus in stream of letters matches letter displayed two items previously (2-back).                                                                                                              | A       | 2-Back<br>0-Back                     | Left            |
| Interval Timing <sup>a</sup>       | 2AFC, indicating if a tone is short (100ms) or long (175ms)                                                                                                                                                                    | A       |                                      | Right           |
| Arithmetic <sup>a</sup>            | 2AFC, indicating if simple multiplication equations (e.g. $2 \times 7 = 14$ ) are correct or incorrect. For control task, participants view a series of four numbers and indicate presence/absence of target number (e.g., 1). | A       | Math<br>Digit Judgment               | Right           |
| IAPS affective <sup>a</sup>        | 2AFC, indicating if picture (scenes, animals, foods) is pleasant or unpleasant.                                                                                                                                                | A       | Pleasant Scenes<br>Unpleasant Scenes | Left            |
| IAPS emotion <sup>a</sup>          | 2AFC, indicating if picture depicts sad or happy face.                                                                                                                                                                         | A       | Happy Faces<br>Sad Faces             | Right           |
| Go/No-Go <sup>a</sup>              | Go-NoGo task with positive (Go) or negative (No Go) words.                                                                                                                                                                     | A       | Go<br>No Go                          | Left            |
| Theory of Mind <sup>a</sup>        | 2AFC to indicate if short story contains true or false belief (Theory of Mind task)                                                                                                                                            | A & B   |                                      | Left            |
| Rest                               | Passive viewing of fixation cross.                                                                                                                                                                                             | A & B   |                                      | None            |
| Object N-Back <sup>a</sup>         | As above, with objects instead of letters (2-back).                                                                                                                                                                            | A & B   | 2-Back<br>0-Back                     | Right           |
| Verb Generation <sup>a</sup>       | Verb generation task requiring covert responses to visually-presented nouns, either repeating the stimulus (Read) or generating a verb associated with the noun (Generate).                                                    | A & B   | Verb Generation<br>Word Reading      | None            |
| Spatial Imagery <sup>a</sup>       | Imagine walking from room to room in childhood home, with a cue specifying the path to be taken (e.g., "Imagine walking from the kitchen to the bedroom, stopping to look around at different rooms").                         | A & B   |                                      | None            |
| Motor Sequence <sup>a</sup>        | 6-element sequence, either requiring one key press with each of six fingers (bimanual) or repetition of a single key press with one finger (unimanual left or right).                                                          | A & B   | Finger Sequence<br>Finger Simple     | Both            |
| Action Observation <sup>a</sup>    | Passive viewing of videos of knots being tied, learning the name of the knot (presented at top of screen) for a latter recall test.                                                                                            | A & B   | Video Actions<br>Video Knots         | None            |

|                                                        |                                                                                                                                                                                                                                                          |       |                                                           |       |
|--------------------------------------------------------|----------------------------------------------------------------------------------------------------------------------------------------------------------------------------------------------------------------------------------------------------------|-------|-----------------------------------------------------------|-------|
| Visual Search <sup>a</sup>                             | 2AFC, indicating if target stimulus (“L”) is present among distractors (“T”), with varying set size (4, 8, 12).                                                                                                                                          | A & B | Small (4)<br>Medium (8)<br>Large (12)                     | Left  |
| Spatial Map                                            | Memorize a spatial mapping of numbers (either, 1, 4, or 7) for subsequent recall                                                                                                                                                                         | B     | Easy (1)<br>Medium (4)<br>Hard (7)                        | Both  |
| Mental Rotation <sup>a</sup>                           | Mentally rotate target object to determine whether it can be brought into alignment with baseline object. Difficulty is measured by angular disparity between target and baseline image. Stimuli were obtained from Ganis and Kievit (2015) <sup>a</sup> | B     | Easy (0)<br>Medium (50)<br>Hard (150)                     | Right |
| Biological Motion <sup>a</sup>                         | 2AFC to identify intact point-light walkers (either happy or sad) or scrambled walkers (fast or slow). Stimuli obtained from Troje et al. (2017) <sup>a</sup>                                                                                            | B     | Biological Motion<br>Scrambled Motion                     | Right |
| Concrete Permuted Rules Operations (CPRO) <sup>a</sup> | Apply task-rule set (logic, sensory, & motor rules) to two consecutively presented stimuli (rectangles: either red or blue, vertical or horizontal)                                                                                                      | B     |                                                           | Both  |
| Word Prediction <sup>a</sup>                           | 2AFC task to indicate if five sequentially-presented words comprise a semantically meaningful sentence. Stimuli obtained from D’Mello et al. (2017) <sup>a</sup>                                                                                         | B     | Prediction<br>Prediction Violated<br>Prediction Scrambled | Left  |
| Response Alternatives <sup>a</sup>                     | Execute a fast motor response to an imperative signal (white cross) that appears in one of 1, 2, or 4 primed positions                                                                                                                                   | B     | Easy (1)<br>Medium (2)<br>Hard (4)                        | Both  |
| Nature Movie <sup>a</sup>                              | Passive viewing of a nature clip of kickboxing kangaroos, taken from “Planet Earth II: Islands”                                                                                                                                                          | B     |                                                           | None  |
| Animated Movie <sup>a</sup>                            | Passive viewing of an emotional love story between two characters from the Pixar movie “Up”                                                                                                                                                              | B     |                                                           | None  |
| Landscape Movie <sup>a</sup>                           | Passive viewing of an aesthetically-pleasing clip that depicts a diverse scenery, taken from Vimeo                                                                                                                                                       | B     |                                                           | None  |

2

3 **Table S1.** Task set description for all 26 unique tasks and 47 unique conditions. Tasks that require overt  
4 motor responses are executed either with the left, right, or both hands.

5

### 6 **References (supplementary)**

- 7 39. Boly, M. *et al.* When thoughts become action : An fMRI paradigm to study volitional brain  
8 activity in non-communicative brain injured patients. *Hum. Brain Mapp. J.* **36**, 979–992 (2007).
- 9 40. Egner, T. & Hirsch, J. The neural correlates and functional integration of cognitive control in a  
10 Stroop task. **24**, 539–547 (2005).
- 11 41. Owen, A. M., McMillan, K. M., Laird, A. R. & Bullmore, E. N-back working memory paradigm:  
12 A meta-analysis of normative functional neuroimaging studies. *Hum. Brain Mapp.* **25**, 46–59

- 13 (2005).
- 14 42. Schubotz, R. I., & von Cramon, D. Y. Interval and ordinal properties of sequences are associated  
15 with distinct premotor areas. *Cerebral Cortex* **11**, 210-222 (2001).
- 16 43. Rickard, T. C., Romero, S. G., Basso, G., Wharton, C., Flitman, S., & Grafman, J. The calculating  
17 brain: an fMRI study. *Neuropsychologia* **38**, 325-335 (2000).
- 18 44. Moulton, E. A., Elman, I., Pendse, G., Schmahmann, J., Becerra, L., & Borsook, D. Aversion-  
19 related circuitry in the cerebellum: responses to noxious heat and unpleasant images. *Journal of*  
20 *neuroscience* **31**, 3795-3804 (2011).
- 21 45. Elliott, R., Rubinsztein, J. S., Sahakian, B. J., & Dolan, R. J. Selective attention to emotional  
22 stimuli in a verbal go/no-go task: an fMRI study. *Neuroreport* **11** 1739-1744 (2000).
- 23 46. Dodell-feder, D., Koster-hale, J., Bedny, M. & Saxe, R. NeuroImage fMRI item analysis in a  
24 theory of mind task. *Neuroimage* **55**, 705–712 (2011).
- 25 47. Fiez, J. A. Cerebellar Contributinos to Cognition. *Neuron* **16**, 13–15 (1996).
- 26 48. Wiestler, T. & Diedrichsen, J. Skill learning strengthens cortical representations of motor  
27 sequences. *Elife* **2013**, 1–20 (2013).
- 28 49. Cross, E. S., Cohen, N. R., Hamilton, A. F. D. C., Ramsey, R., Wolford, G., & Grafton, S. T.  
29 Physical experience leads to enhanced object perception in parietal cortex: insights from knot  
30 tying. *Neuropsychologia* **50**, 3207-3217 (2012).
- 31 50. Donner, T. H., Kettermann, A., Diesch, E., Ostendorf, F., Villringer, A., & Brandt, S. A. Visual  
32 feature and conjunction searches of equal difficulty engage only partially overlapping  
33 frontoparietal networks. *Neuroimage* **15**, 16-25 (2002).
- 34 51. Shepard, R. N. & Metzler, J. Mental Rotation of Three-Dimensional Objects. *Science (80-. )*. **171**,  
35 701–703 (1971).
- 36 52. Ganis, G. & Kievit, R. A. A new set of three-dimensional shapes for investigating mental rotation  
37 processes: validation data and stimulus set. *J. Chem. Inf. Model.* **53**, 1689–1699 (2013).
- 38 53. Troje, N. F. Decomposing biological motion: A framework for analysis and synthesis of human  
39 gait patterns. *Journal of vision* **2**, 2-2 (2002).
- 40 54. Ito, T., Kulkarni, K. R., Schultz, D. H., Mill, R. D., Chen, R. H., Solomyak, L. I., & Cole, M. W.  
41 Cognitive task information is transferred between brain regions via resting-state network  
42 topology. *Nature communications* **8**, 1027 (2017).
- 43

- 44 55. Moberget, T., Gullesen, E. H., Andersson, S., Ivry, R. B. & Endestad, T. Generalized Role for the  
45 Cerebellum in Encoding Internal Models: Evidence from Semantic Processing. *J. Neurosci.* **34**,  
46 2871–2878 (2014).
- 47 56. D'Mello, A. M., Turkeltaub, P. E., & Stoodley, C. J. Cerebellar tDCS modulates neural circuits  
48 during semantic prediction: a combined tDCS-fMRI study. *Journal of Neuroscience* **37**, 1604-  
49 1613 (2017).
- 50 57. Bischoff-Grethe, A., Ivry, R. B., & Grafton, S. T. Cerebellar involvement in response  
51 reassignment rather than attention. *Journal of Neuroscience* **22**, 546-553 (2002).  
52
